# Supplementary material for: Optimal concentration of ropivacaine for brachial plexus blocks in adult patients undergoing upper limb surgeries: a systematic review and meta-analysis
Source: Front Pharmacol. 2023 Nov 16;14:1288697. doi: 10.3389/fphar.2023.1288697 (PMC10687368; doi:10.3389/fphar.2023.1288697)
Supplement: Supplementary file 1 [file Table3.XLSX]

## Sheet: Sheet1
Unique ID	A. Casati,1999	Study ID		Assessor
Ref or Label		Aim	assignment to intervention (the 'intention-to-treat' effect)
Experimental		Comparator		Source	Journal article(s) with results of the trial
Outcome		Results		Weight	1
Domain	Signalling question			Response	Comments
Bias arising from the randomization process	1.1 Was the allocation sequence random?			Y	Using sealed envelopes，patients were randomized to receive 20 ml of 0.5% ropivacaine(n=15, injected dose 100 mg), 0.75% ropivacaine(n=15, injected dose 150 mg), 1% ropivacaine (n=l5,injected dose 200 mg) or 2% mepivacaine (n=15, injected dose 400 mg).
	1.2 Was the allocation sequence concealed until participants were enrolled and assigned to interventions?			Y
	1.3 Did baseline differences between intervention groups suggest a problem with the randomization process?			N
	Risk of bias judgement			Low
Bias due to deviations from intended interventions	2.1.Were participants aware of their assigned intervention during the trial?			N	Sterile syringes containing the solutions were prepared in a double-blind manner by one of the authors who took no further part in the manage ment of patients.
	2.2.Were carers and people delivering the interventions aware of participants' assigned intervention during the trial?			N
	2.3. If Y/PY/NI to 2.1 or 2.2: Were there deviations from the intended intervention that arose because of the experimental context?			NA
	2.4 If Y/PY to 2.3: Were these deviations likely to have affected the outcome?			NA
	2.5. If Y/PY/NI to 2.4: Were these deviations from intended intervention balanced between groups?			NA
	2.6 Was an appropriate analysis used to estimate the effect of assignment to intervention?			Y
	2.7 If N/PN/NI to 2.6: Was there potential for a substantial impact (on the result) of the failure to analyse participants in the group to which they were randomized?			NA
	Risk of bias judgement			Low
Bias due to missing outcome data	3.1 Were data for this outcome available for all, or nearly all, participants randomized?			Y
	3.2 If N/PN/NI to 3.1: Is there evidence that result was not biased by missing outcome data?			NA
	3.3 If N/PN to 3.2: Could missingness in the outcome depend on its true value?			NA
	3.4 If Y/PY/NI to 3.3: Is it likely that missingness in the outcome depended on its true value?			NA
	Risk of bias judgement			Low
Bias in measurement of the outcome	4.1 Was the method of measuring the outcome inappropriate?			N
	4.2 Could measurement or ascertainment of the outcome have differed between intervention groups?			N
	4.3 Were outcome assessors aware of the intervention received by study participants?			PN	Data collection was always performed by an independent observer blinded to the anaesthetic solution injected.
	4.4 If Y/PY/NI to 4.3: Could assessment of the outcome have been influenced by knowledge of intervention received?			NA
	4.5 If Y/PY/NI to 4.4: Is it likely that assessment of the outcome was influenced by knowledge of intervention received?			NA
	Risk of bias judgement			Low
Bias in selection of the reported result	5.1 Were the data that produced this result analysed in accordance with a pre-specified analysis plan that was finalized before unblinded outcome data were available for analysis?			Y
	5.2 ... multiple eligible outcome measurements (e.g. scales, definitions, time points) within the outcome domain?			N
	5.3 ... multiple eligible analyses of the data?			N
	Risk of bias judgement			Low
Overall bias	Risk of bias judgement			Low
Unique ID	Andrea Casati,1999	Study ID		Assessor
Ref or Label		Aim	assignment to intervention (the 'intention-to-treat' effect)
Experimental		Comparator		Source	Journal article(s) with results of the trial; Trial protocol
Outcome		Results		Weight	1
Domain	Signalling question			Response	Comments
Bias arising from the randomization process	1.1 Was the allocation sequence random?			Y	Using sealed envelopes，patients were randomized to receive 20 mL of either2% mepivacaine (n＝10), 0.5% ropivacaine (n＝10), or0.75% ropivacaine (n＝10)
	1.2 Was the allocation sequence concealed until participants were enrolled and assigned to interventions?			Y
	1.3 Did baseline differences between intervention groups suggest a problem with the randomization process?			N
	Risk of bias judgement			Low
Bias due to deviations from intended interventions	2.1.Were participants aware of their assigned intervention during the trial?			N	Sterile syringes containing the local anesthetic solution were prepared in a double-blinded fashion by one of the authors, who did not take part in the further management of the patients.
	2.2.Were carers and people delivering the interventions aware of participants' assigned intervention during the trial?			N
	2.3. If Y/PY/NI to 2.1 or 2.2: Were there deviations from the intended intervention that arose because of the experimental context?			NA
	2.4 If Y/PY to 2.3: Were these deviations likely to have affected the outcome?			NA
	2.5. If Y/PY/NI to 2.4: Were these deviations from intended intervention balanced between groups?			NA
	2.6 Was an appropriate analysis used to estimate the effect of assignment to intervention?			Y
	2.7 If N/PN/NI to 2.6: Was there potential for a substantial impact (on the result) of the failure to analyse participants in the group to which they were randomized?			NA
	Risk of bias judgement			Low
Bias due to missing outcome data	3.1 Were data for this outcome available for all, or nearly all, participants randomized?			Y
	3.2 If N/PN/NI to 3.1: Is there evidence that result was not biased by missing outcome data?			NA
	3.3 If N/PN to 3.2: Could missingness in the outcome depend on its true value?			NA
	3.4 If Y/PY/NI to 3.3: Is it likely that missingness in the outcome depended on its true value?			NA
	Risk of bias judgement			Low
Bias in measurement of the outcome	4.1 Was the method of measuring the outcome inappropriate?			N
	4.2 Could measurement or ascertainment of the outcome have differed between intervention groups?			N
	4.3 Were outcome assessors aware of the intervention received by study participants?			PN
	4.4 If Y/PY/NI to 4.3: Could assessment of the outcome have been influenced by knowledge of intervention received?			NA
	4.5 If Y/PY/NI to 4.4: Is it likely that assessment of the outcome was influenced by knowledge of intervention received?			NA
	Risk of bias judgement			Low
Bias in selection of the reported result	5.1 Were the data that produced this result analysed in accordance with a pre-specified analysis plan that was finalized before unblinded outcome data were available for analysis?			PY
	5.2 ... multiple eligible outcome measurements (e.g. scales, definitions, time points) within the outcome domain?			N
	5.3 ... multiple eligible analyses of the data?			N
	Risk of bias judgement			Low
Overall bias	Risk of bias judgement			Low
Unique ID	Ben Safa,2021	Study ID		Assessor
Ref or Label		Aim	assignment to intervention (the 'intention-to-treat' effect)
Experimental		Comparator		Source	Journal article(s) with results of the trial; Trial protocol
Outcome		Results		Weight	1
Domain	Signalling question			Response	Comments
Bias arising from the randomization process	1.1 Was the allocation sequence random?			Y	The computer-generated randomization sequence and sequentially numbered, sealed, opaque envelopes were prepared by an individual not other wise involved in study conduct to maintain blinding and allocation concealment. The randomization list was kept in a secure location inaccessible to investigators, statistician, and outcome assessors.
	1.2 Was the allocation sequence concealed until participants were enrolled and assigned to interventions?			Y
	1.3 Did baseline differences between intervention groups suggest a problem with the randomization process?			N
	Risk of bias judgement			Low
Bias due to deviations from intended interventions	2.1.Were participants aware of their assigned intervention during the trial?			N	All individuals were blinded including study participants, anesthesiologists, surgeons, research personnel, and statistician._x000D_
	2.2.Were carers and people delivering the interventions aware of participants' assigned intervention during the trial?			N
	2.3. If Y/PY/NI to 2.1 or 2.2: Were there deviations from the intended intervention that arose because of the experimental context?			NA
	2.4 If Y/PY to 2.3: Were these deviations likely to have affected the outcome?			NA
	2.5. If Y/PY/NI to 2.4: Were these deviations from intended intervention balanced between groups?			NA
	2.6 Was an appropriate analysis used to estimate the effect of assignment to intervention?			Y
	2.7 If N/PN/NI to 2.6: Was there potential for a substantial impact (on the result) of the failure to analyse participants in the group to which they were randomized?			NA
	Risk of bias judgement			Low
Bias due to missing outcome data	3.1 Were data for this outcome available for all, or nearly all, participants randomized?			Y
	3.2 If N/PN/NI to 3.1: Is there evidence that result was not biased by missing outcome data?			NA
	3.3 If N/PN to 3.2: Could missingness in the outcome depend on its true value?			NA
	3.4 If Y/PY/NI to 3.3: Is it likely that missingness in the outcome depended on its true value?			NA
	Risk of bias judgement			Low
Bias in measurement of the outcome	4.1 Was the method of measuring the outcome inappropriate?			N
	4.2 Could measurement or ascertainment of the outcome have differed between intervention groups?			N
	4.3 Were outcome assessors aware of the intervention received by study participants?			N
	4.4 If Y/PY/NI to 4.3: Could assessment of the outcome have been influenced by knowledge of intervention received?			NA
	4.5 If Y/PY/NI to 4.4: Is it likely that assessment of the outcome was influenced by knowledge of intervention received?			NA
	Risk of bias judgement			Low
Bias in selection of the reported result	5.1 Were the data that produced this result analysed in accordance with a pre-specified analysis plan that was finalized before unblinded outcome data were available for analysis?			Y
	5.2 ... multiple eligible outcome measurements (e.g. scales, definitions, time points) within the outcome domain?			N
	5.3 ... multiple eligible analyses of the data?			N
	Risk of bias judgement			Low
Overall bias	Risk of bias judgement			Low
Unique ID	Stephen M. Klein1998	Study ID		Assessor
Ref or Label		Aim	assignment to intervention (the 'intention-to-treat' effect)
Experimental		Comparator		Source	Journal article(s) with results of the trial; Trial protocol
Outcome		Results		Weight	1
Domain	Signalling question			Response	Comments
Bias arising from the randomization process	1.1 Was the allocation sequence random?			NI
	1.2 Was the allocation sequence concealed until participants were enrolled and assigned to interventions?			NI
	1.3 Did baseline differences between intervention groups suggest a problem with the randomization process?			N
	Risk of bias judgement			Some concerns
Bias due to deviations from intended interventions	2.1.Were participants aware of their assigned intervention during the trial?			N
	2.2.Were carers and people delivering the interventions aware of participants' assigned intervention during the trial?			N
	2.3. If Y/PY/NI to 2.1 or 2.2: Were there deviations from the intended intervention that arose because of the experimental context?			NA
	2.4 If Y/PY to 2.3: Were these deviations likely to have affected the outcome?			NA
	2.5. If Y/PY/NI to 2.4: Were these deviations from intended intervention balanced between groups?			NA
	2.6 Was an appropriate analysis used to estimate the effect of assignment to intervention?			Y
	2.7 If N/PN/NI to 2.6: Was there potential for a substantial impact (on the result) of the failure to analyse participants in the group to which they were randomized?			NA
	Risk of bias judgement			Low
Bias due to missing outcome data	3.1 Were data for this outcome available for all, or nearly all, participants randomized?			Y
	3.2 If N/PN/NI to 3.1: Is there evidence that result was not biased by missing outcome data?			NA
	3.3 If N/PN to 3.2: Could missingness in the outcome depend on its true value?			NA
	3.4 If Y/PY/NI to 3.3: Is it likely that missingness in the outcome depended on its true value?			NA
	Risk of bias judgement			Low
Bias in measurement of the outcome	4.1 Was the method of measuring the outcome inappropriate?			N
	4.2 Could measurement or ascertainment of the outcome have differed between intervention groups?			N
	4.3 Were outcome assessors aware of the intervention received by study participants?			NI
	4.4 If Y/PY/NI to 4.3: Could assessment of the outcome have been influenced by knowledge of intervention received?			PN
	4.5 If Y/PY/NI to 4.4: Is it likely that assessment of the outcome was influenced by knowledge of intervention received?			NA
	Risk of bias judgement			Low
Bias in selection of the reported result	5.1 Were the data that produced this result analysed in accordance with a pre-specified analysis plan that was finalized before unblinded outcome data were available for analysis?			Y
	5.2 ... multiple eligible outcome measurements (e.g. scales, definitions, time points) within the outcome domain?			N
	5.3 ... multiple eligible analyses of the data?			N
	Risk of bias judgement			Low
Overall bias	Risk of bias judgement			Low
Unique ID	Susanne C. Krone2001	Study ID		Assessor
Ref or Label		Aim	assignment to intervention (the 'intention-to-treat' effect)
Experimental		Comparator		Source	Journal article(s) with results of the trial; Trial protocol
Outcome		Results		Weight	1
Domain	Signalling question			Response	Comments
Bias arising from the randomization process	1.1 Was the allocation sequence random?			Y	randomized by a computer-generated list
	1.2 Was the allocation sequence concealed until participants were enrolled and assigned to interventions?			NI
	1.3 Did baseline differences between intervention groups suggest a problem with the randomization process?			N
	Risk of bias judgement			Some concerns
Bias due to deviations from intended interventions	2.1.Were participants aware of their assigned intervention during the trial?			N	The study solution was prepared by an independent anesthesiologist_x000D_ not involved in the study or patient care._x000D_
	2.2.Were carers and people delivering the interventions aware of participants' assigned intervention during the trial?			N
	2.3. If Y/PY/NI to 2.1 or 2.2: Were there deviations from the intended intervention that arose because of the experimental context?			NA
	2.4 If Y/PY to 2.3: Were these deviations likely to have affected the outcome?			NA
	2.5. If Y/PY/NI to 2.4: Were these deviations from intended intervention balanced between groups?			NA
	2.6 Was an appropriate analysis used to estimate the effect of assignment to intervention?			Y
	2.7 If N/PN/NI to 2.6: Was there potential for a substantial impact (on the result) of the failure to analyse participants in the group to which they were randomized?			NA
	Risk of bias judgement			Low
Bias due to missing outcome data	3.1 Were data for this outcome available for all, or nearly all, participants randomized?			Y
	3.2 If N/PN/NI to 3.1: Is there evidence that result was not biased by missing outcome data?			NA
	3.3 If N/PN to 3.2: Could missingness in the outcome depend on its true value?			NA
	3.4 If Y/PY/NI to 3.3: Is it likely that missingness in the outcome depended on its true value?			NA
	Risk of bias judgement			Low
Bias in measurement of the outcome	4.1 Was the method of measuring the outcome inappropriate?			N
	4.2 Could measurement or ascertainment of the outcome have differed between intervention groups?			N
	4.3 Were outcome assessors aware of the intervention received by study participants?			N	An investigator un aware of the nature of the study medication performed the following assessments
	4.4 If Y/PY/NI to 4.3: Could assessment of the outcome have been influenced by knowledge of intervention received?			NA
	4.5 If Y/PY/NI to 4.4: Is it likely that assessment of the outcome was influenced by knowledge of intervention received?			NA
	Risk of bias judgement			Low
Bias in selection of the reported result	5.1 Were the data that produced this result analysed in accordance with a pre-specified analysis plan that was finalized before unblinded outcome data were available for analysis?			Y
	5.2 ... multiple eligible outcome measurements (e.g. scales, definitions, time points) within the outcome domain?			N
	5.3 ... multiple eligible analyses of the data?			N
	Risk of bias judgement			Low
Overall bias	Risk of bias judgement			Low
Unique ID	Wenwen Zha2016	Study ID		Assessor
Ref or Label		Aim	assignment to intervention (the 'intention-to-treat' effect)
Experimental		Comparator		Source	Journal article(s) with results of the trial; Trial protocol
Outcome		Results		Weight	1
Domain	Signalling question			Response	Comments
Bias arising from the randomization process	1.1 Was the allocation sequence random?			Y	Using a computer generated random number table，patients were randomized into three groups_x000D_ Sealed opaque envelopes with the study group allocation were opened before the blocks were performed.
	1.2 Was the allocation sequence concealed until participants were enrolled and assigned to interventions?			Y
	1.3 Did baseline differences between intervention groups suggest a problem with the randomization process?			N
	Risk of bias judgement			Low
Bias due to deviations from intended interventions	2.1.Were participants aware of their assigned intervention during the trial?			N	An independent anesthesiologist who was not involved in the study prepared the study solution._x000D_ All patients were blind to their group throughout the study.
	2.2.Were carers and people delivering the interventions aware of participants' assigned intervention during the trial?			N
	2.3. If Y/PY/NI to 2.1 or 2.2: Were there deviations from the intended intervention that arose because of the experimental context?			NA
	2.4 If Y/PY to 2.3: Were these deviations likely to have affected the outcome?			NA
	2.5. If Y/PY/NI to 2.4: Were these deviations from intended intervention balanced between groups?			NA
	2.6 Was an appropriate analysis used to estimate the effect of assignment to intervention?			Y
	2.7 If N/PN/NI to 2.6: Was there potential for a substantial impact (on the result) of the failure to analyse participants in the group to which they were randomized?			NA
	Risk of bias judgement			Low
Bias due to missing outcome data	3.1 Were data for this outcome available for all, or nearly all, participants randomized?			Y
	3.2 If N/PN/NI to 3.1: Is there evidence that result was not biased by missing outcome data?			NA
	3.3 If N/PN to 3.2: Could missingness in the outcome depend on its true value?			NA
	3.4 If Y/PY/NI to 3.3: Is it likely that missingness in the outcome depended on its true value?			NA
	Risk of bias judgement			Low
Bias in measurement of the outcome	4.1 Was the method of measuring the outcome inappropriate?			N
	4.2 Could measurement or ascertainment of the outcome have differed between intervention groups?			N
	4.3 Were outcome assessors aware of the intervention received by study participants?			N	After completion of the block, all the evaluations were performed by another blinded independent observer who was not involved in grouping, study solution preparing and interscalene block performing.
	4.4 If Y/PY/NI to 4.3: Could assessment of the outcome have been influenced by knowledge of intervention received?			NA
	4.5 If Y/PY/NI to 4.4: Is it likely that assessment of the outcome was influenced by knowledge of intervention received?			NA
	Risk of bias judgement			Low
Bias in selection of the reported result	5.1 Were the data that produced this result analysed in accordance with a pre-specified analysis plan that was finalized before unblinded outcome data were available for analysis?			PY
	5.2 ... multiple eligible outcome measurements (e.g. scales, definitions, time points) within the outcome domain?			N
	5.3 ... multiple eligible analyses of the data?			N
	Risk of bias judgement			Low
Overall bias	Risk of bias judgement			Low
Unique ID	Shuang Wang,2022	Study ID		Assessor
Ref or Label		Aim	assignment to intervention (the 'intention-to-treat' effect)
Experimental		Comparator		Source	Journal article(s) with results of the trial; Trial protocol
Outcome		Results		Weight	1
Domain	Signalling question			Response	Comments
Bias arising from the randomization process	1.1 Was the allocation sequence random?			Y	A computer-generated randomization list (1 =experimental group, 2 = control group) was prepared by a third party not associated with the study. _x000D_ The randomization list was contained in a sealed, opaque envelope._x000D_
	1.2 Was the allocation sequence concealed until participants were enrolled and assigned to interventions?			Y
	1.3 Did baseline differences between intervention groups suggest a problem with the randomization process?			N
	Risk of bias judgement			Low
Bias due to deviations from intended interventions	2.1.Were participants aware of their assigned intervention during the trial?			N	The investigator, anesthesiologists, outcome assessor, patients, and statistician were all blinded to group allocation.
	2.2.Were carers and people delivering the interventions aware of participants' assigned intervention during the trial?			N
	2.3. If Y/PY/NI to 2.1 or 2.2: Were there deviations from the intended intervention that arose because of the experimental context?			NA
	2.4 If Y/PY to 2.3: Were these deviations likely to have affected the outcome?			NA
	2.5. If Y/PY/NI to 2.4: Were these deviations from intended intervention balanced between groups?			NA
	2.6 Was an appropriate analysis used to estimate the effect of assignment to intervention?			Y
	2.7 If N/PN/NI to 2.6: Was there potential for a substantial impact (on the result) of the failure to analyse participants in the group to which they were randomized?			NA
	Risk of bias judgement			Low
Bias due to missing outcome data	3.1 Were data for this outcome available for all, or nearly all, participants randomized?			Y
	3.2 If N/PN/NI to 3.1: Is there evidence that result was not biased by missing outcome data?			NA
	3.3 If N/PN to 3.2: Could missingness in the outcome depend on its true value?			NA
	3.4 If Y/PY/NI to 3.3: Is it likely that missingness in the outcome depended on its true value?			NA
	Risk of bias judgement			Low
Bias in measurement of the outcome	4.1 Was the method of measuring the outcome inappropriate?			N
	4.2 Could measurement or ascertainment of the outcome have differed between intervention groups?			N
	4.3 Were outcome assessors aware of the intervention received by study participants?			N	The investigator, anesthesiologists, outcome assessor, patients, and statistician were all blinded to group allocation.
	4.4 If Y/PY/NI to 4.3: Could assessment of the outcome have been influenced by knowledge of intervention received?			NA
	4.5 If Y/PY/NI to 4.4: Is it likely that assessment of the outcome was influenced by knowledge of intervention received?			NA
	Risk of bias judgement			Low
Bias in selection of the reported result	5.1 Were the data that produced this result analysed in accordance with a pre-specified analysis plan that was finalized before unblinded outcome data were available for analysis?			PY
	5.2 ... multiple eligible outcome measurements (e.g. scales, definitions, time points) within the outcome domain?			N
	5.3 ... multiple eligible analyses of the data?			N
	Risk of bias judgement			Low
Overall bias	Risk of bias judgement			Low
Unique ID	Ranjan R Venkatesh,2016	Study ID		Assessor
Ref or Label		Aim	assignment to intervention (the 'intention-to-treat' effect)
Experimental		Comparator		Source	Journal article(s) with results of the trial; Trial protocol
Outcome		Results		Weight	1
Domain	Signalling question			Response	Comments
Bias arising from the randomization process	1.1 Was the allocation sequence random?			Y	Block randomization was done according to the computer generated random numbers generated using Microsoft Excel Program. _x000D_ The random numbers were kept concealed in opaque sealed envelopes and were opened after obtaining informed consent from the patient._x000D_
	1.2 Was the allocation sequence concealed until participants were enrolled and assigned to interventions?			Y
	1.3 Did baseline differences between intervention groups suggest a problem with the randomization process?			N
	Risk of bias judgement			Low
Bias due to deviations from intended interventions	2.1.Were participants aware of their assigned intervention during the trial?			N	The envelope was opened by an anaesthesiologist not involved in the study and the study medication was prepared and handed over to the researcher. _x000D_ Neither the researcher nor the patient was aware of the study medication._x000D_ Immediately after the block placement, patients were evaluated every 4min，by an operator unaware of the injected solution
	2.2.Were carers and people delivering the interventions aware of participants' assigned intervention during the trial?			N
	2.3. If Y/PY/NI to 2.1 or 2.2: Were there deviations from the intended intervention that arose because of the experimental context?			NA
	2.4 If Y/PY to 2.3: Were these deviations likely to have affected the outcome?			NA
	2.5. If Y/PY/NI to 2.4: Were these deviations from intended intervention balanced between groups?			NA
	2.6 Was an appropriate analysis used to estimate the effect of assignment to intervention?			Y
	2.7 If N/PN/NI to 2.6: Was there potential for a substantial impact (on the result) of the failure to analyse participants in the group to which they were randomized?			NA
	Risk of bias judgement			Low
Bias due to missing outcome data	3.1 Were data for this outcome available for all, or nearly all, participants randomized?			Y
	3.2 If N/PN/NI to 3.1: Is there evidence that result was not biased by missing outcome data?			NA
	3.3 If N/PN to 3.2: Could missingness in the outcome depend on its true value?			NA
	3.4 If Y/PY/NI to 3.3: Is it likely that missingness in the outcome depended on its true value?			NA
	Risk of bias judgement			Low
Bias in measurement of the outcome	4.1 Was the method of measuring the outcome inappropriate?			N
	4.2 Could measurement or ascertainment of the outcome have differed between intervention groups?			N
	4.3 Were outcome assessors aware of the intervention received by study participants?			PN
	4.4 If Y/PY/NI to 4.3: Could assessment of the outcome have been influenced by knowledge of intervention received?			NA
	4.5 If Y/PY/NI to 4.4: Is it likely that assessment of the outcome was influenced by knowledge of intervention received?			NA
	Risk of bias judgement			Low
Bias in selection of the reported result	5.1 Were the data that produced this result analysed in accordance with a pre-specified analysis plan that was finalized before unblinded outcome data were available for analysis?			PY
	5.2 ... multiple eligible outcome measurements (e.g. scales, definitions, time points) within the outcome domain?			N
	5.3 ... multiple eligible analyses of the data?			N
	Risk of bias judgement			Low
Overall bias	Risk of bias judgement			Low
Unique ID	Laura Bertini1999	Study ID		Assessor
Ref or Label		Aim	assignment to intervention (the 'intention-to-treat' effect)
Experimental		Comparator		Source	Journal article(s) with results of the trial; Trial protocol
Outcome		Results		Weight	1
Domain	Signalling question			Response	Comments
Bias arising from the randomization process	1.1 Was the allocation sequence random?			NI
	1.2 Was the allocation sequence concealed until participants were enrolled and assigned to interventions?			NI
	1.3 Did baseline differences between intervention groups suggest a problem with the randomization process?			N
	Risk of bias judgement			Some concerns
Bias due to deviations from intended interventions	2.1.Were participants aware of their assigned intervention during the trial?			N	A blind observer assessed sensory and motor block._x000D_ At the end of surgery, all patients were asked by an observer unaware of group assignment to express a score about the quality of their own anesthesia as they perceived it during the procedure
	2.2.Were carers and people delivering the interventions aware of participants' assigned intervention during the trial?			PN
	2.3. If Y/PY/NI to 2.1 or 2.2: Were there deviations from the intended intervention that arose because of the experimental context?			NA
	2.4 If Y/PY to 2.3: Were these deviations likely to have affected the outcome?			NA
	2.5. If Y/PY/NI to 2.4: Were these deviations from intended intervention balanced between groups?			NA
	2.6 Was an appropriate analysis used to estimate the effect of assignment to intervention?			Y
	2.7 If N/PN/NI to 2.6: Was there potential for a substantial impact (on the result) of the failure to analyse participants in the group to which they were randomized?			NA
	Risk of bias judgement			Low
Bias due to missing outcome data	3.1 Were data for this outcome available for all, or nearly all, participants randomized?			Y
	3.2 If N/PN/NI to 3.1: Is there evidence that result was not biased by missing outcome data?			NA
	3.3 If N/PN to 3.2: Could missingness in the outcome depend on its true value?			NA
	3.4 If Y/PY/NI to 3.3: Is it likely that missingness in the outcome depended on its true value?			NA
	Risk of bias judgement			Low
Bias in measurement of the outcome	4.1 Was the method of measuring the outcome inappropriate?			N
	4.2 Could measurement or ascertainment of the outcome have differed between intervention groups?			N
	4.3 Were outcome assessors aware of the intervention received by study participants?			PN
	4.4 If Y/PY/NI to 4.3: Could assessment of the outcome have been influenced by knowledge of intervention received?			NA
	4.5 If Y/PY/NI to 4.4: Is it likely that assessment of the outcome was influenced by knowledge of intervention received?			NA
	Risk of bias judgement			Low
Bias in selection of the reported result	5.1 Were the data that produced this result analysed in accordance with a pre-specified analysis plan that was finalized before unblinded outcome data were available for analysis?			Y
	5.2 ... multiple eligible outcome measurements (e.g. scales, definitions, time points) within the outcome domain?			N
	5.3 ... multiple eligible analyses of the data?			N
	Risk of bias judgement			Low
Overall bias	Risk of bias judgement			Low
